# Supplementary material for: Influence of lung CT changes in chronic obstructive pulmonary disease (COPD) on the human lung microbiome
Source: PLOS journal article supplement (doi:10.1371/journal.pone.0180859), 2017-07-13
Supplement: S3 (10.1371/journal.pone.0180859.s003) [file journal.pone.0180859.s003]

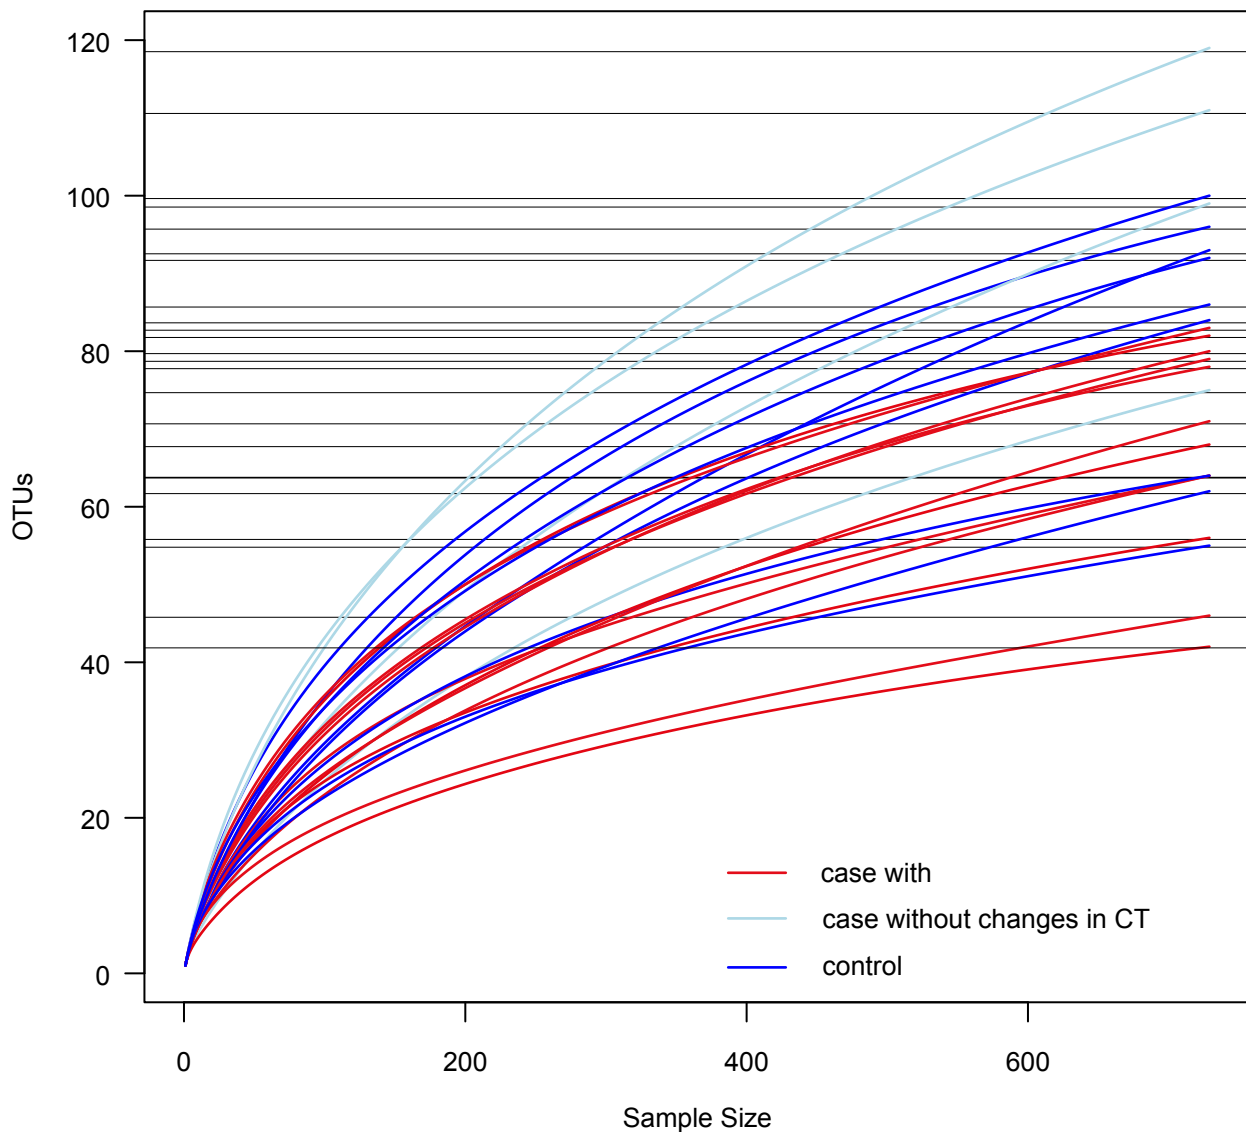

**Figure S2 Rarefaction plot of COPD cases and controls for OTUs clustered on 95% identity.** All samples were subsampled to 722 reads. Colors of the rarefaction curves indicate the sample types. The number of reads is shown on the x-axis and the corresponding number of OTUs on the y-axis.
